# Supplementary material for: Exposure to Zinc Oxide Nanoparticles Disrupts Endothelial Tight and Adherens Junctions and Induces Pulmonary Inflammatory Cell Infiltration
Source: MDPI journal article supplement (doi:10.3390/ijms21103437), 2020-05-13
Supplement: s1 [file s1]

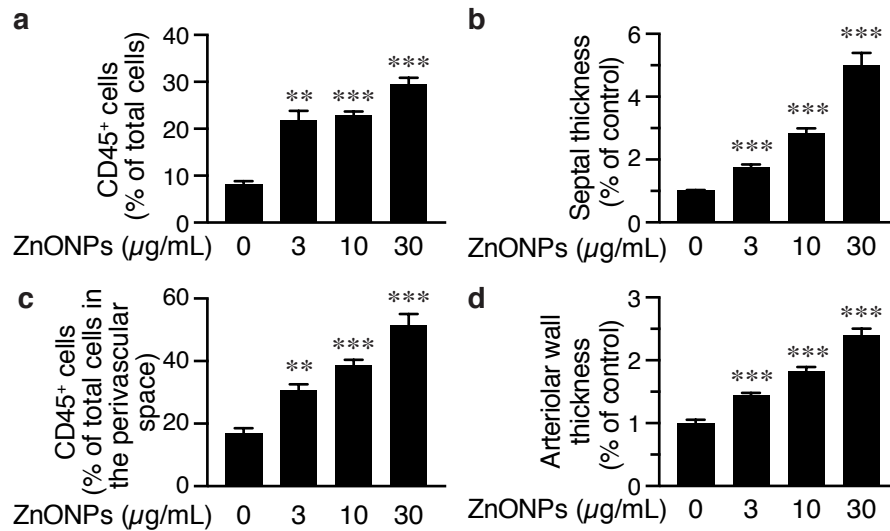

Figure S1. Quantification of inflammatory cell infiltration and morphological changes of alveoli and pulmonary arterioles in mice following repeated exposure to ZnONPs. **(a)** Number of infiltrated leukocytes normalized by the total cell number per field of view. An average from 5-6 fields of view was used for each mouse (n=4 each condition). **(b)** Alveolar septal thickness in mice was quantified, with 6-8 fields of views for each mouse (n=6 each condition). **(c)** Number of infiltrated leukocytes normalized by the total cell number in the perivascular space. An average from 6-10 perivascular spaces was used for each mouse (n=4 each condition). **(d)** Arteriolar wall thickness was quantified (n=5, each). Data are mean  $\pm$  SE, Student's *t*-test, \*\**p* < 0.01, \*\*\**p* < 0.001 vs. control.
